# Supplementary material for: Bone-targeted agent use for bone metastases from breast cancer and prostate cancer: A patient survey
Source: PubMed Central journal article supplement — J Bone Oncol. 2013 Jun 21;2(3):105–9. doi: 10.1016/j.jbo.2013.05.002 (PMC4723402; doi:10.1016/j.jbo.2013.05.002), 2013-06-21
Supplement: mmc1.pdf [file mmc1.pdf]

1  
2  
3 **Online Supplement:**  
4 **Canadian Patients Use of Bone Targeted Therapies - Survey**  
5  
6  
7

---

8 **Survey of Canadian Patients With Bone Metastases From Breast Cancer and**  
9 **Prostate Cancer**

10 The most common place that breast cancer and prostate cancer can spread to is the bone. For  
11 patients with spread of their cancer to bone, doctors often prescribe bone-targeted therapies such  
12 as clodronate (Bonafos, Loron, Clodron), pamidronate (Aredia), zoledronate (Zometa or Aclasta),  
13 or denosumab (Xgeva). We are trying to improve the care of our patients by trying to learn more  
14 about how these drugs are used in Canada, but also to learn more from patients about how you  
15 think we could improve your care. The questions are brief and the survey should not take more  
16 than 15 minutes to complete . These questions are all related to your bone metastases and the  
17 bone-targeted therapies you may be receiving (such as, clodronate, pamidronate, zoledronate,  
18 denosumab). They do NOT relate to your other cancer treatments such as chemotherapy.  
19  
20  
21  
22  
23

24 **Question 1**

25 What type of cancer do you have?

- 26  
27  breast cancer  
28  
29  prostate cancer  
30  
31  other (please specify): \_\_\_\_\_  
32  
33

34  
35 **Question 2**

36 Has your cancer spread to your bones?

- 37  
38  Yes  
39  
40  No  
41  
42  
43

44 **Question 3**

45 Are you currently receiving or have you ever received a bone-targeted therapy? (i.e. medication  
46 for your bones)

- 47  
48  Yes  
49  
50  No  
51  
52  
53

54 **Question 4**

55 Please indicate the bone targeted therapy you are currently receiving or the last bone targeted  
56 agent you received.

- 57  
58  I currently receive Clodronate (Bonafos, Loron, Clodron)  
59  
60  I currently receive Pamidronate (Aredia)  
61  
62  
63  
64  
65

- 1  
2  
3  
4  
5  
6  
7  
8  
9
- I currently receive Zoledronate (Zometa, Aclasta)
  - I currently receive Denosumab (Xgeva)
  - I no longer receive this form of treatment, but the last one that I received was:  
\_\_\_\_\_

10  
11

### Question 5

12 How often do you currently receive your bone-targeted therapy?

- 13  
14  
15  
16  
17  
18  
19  
20  
21  
22
- tablets daily
  - an injection every 3-4 weeks
  - an injection every 3 months
  - Other, please specify: \_\_\_\_\_

23  
24

### Question 6

25 How long have you been on bone-targeted therapy (any combination of clodronate, pamidronate,  
26 zoledronate, or denosumab) for cancer in your bones?

- 27  
28  
29  
30  
31  
32  
33  
34  
35  
36
- less than 3 months
  - between 3 months and 1 year
  - between 1 and 2 years
  - more than 2 years

37  
38

### Question 7

39 How much longer do you think you will be on bone-targeted therapy for?

- 40  
41  
42  
43  
44  
45  
46  
47  
48  
49  
50  
51
- I do not know
  - a total of 2 years
  - as long as I remain well enough to come to the centre to get it
  - as long as my doctor keeps prescribing it
  - Other, please specify: \_\_\_\_\_

52  
53

### Question 8

54 Are you aware of any potential side effects of your bone-targeted therapy?

- 55  
56  
57  
58  
59  
60  
61  
62  
63  
64  
65
- Yes. If yes, please list those you are aware of here: \_\_\_\_\_
  - No

1  
2 **Question 9**

3 Where do you receive your bone-targeted therapy?  
4

- 5  I take tablets at home  
6  
7  I get injections at home by a homecare nurse or other person  
8  
9  I give myself an injection at home  
10  
11  I go to my family doctor for an injection  
12  
13  I get it at the hospital in the chemotherapy unit  
14  
15  Other, please specify: \_\_\_\_\_  
16  
17

18 **Question 10**

19 Why do you think your doctor has prescribed you a bone-targeted drug (i.e. what benefit do YOU  
20 think you are getting from this drug)? Please tick ALL reasons that apply.  
21

- 22  To reduce the chance of bone fractures due to the cancer  
23  
24  To reduce the chance of needing radiotherapy or surgery to my bones  
25  
26  To make sure my blood calcium level does not go dangerously high  
27  
28  To reduce the chance of my cancer causing severe damage to my spine  
29  
30  To reduce my chance of having cancer pain  
31  
32  To slow down the growth of my cancer  
33  
34  To help me live longer  
35  
36  I am unsure why I am being prescribed these drugs  
37  
38  Other – please specify: \_\_\_\_\_  
39  
40

41 **Question 11**

42 Many bone targeted therapies are given at a standard dose, for example pamidronate is usually  
43 given at 90mg. If it was possible to receive a reduced dose and still receive the same benefits,  
44 would you be willing to take a reduced dose?  
45

- 46  Yes  
47  
48  No  
49  
50  
51  Other, please specify: \_\_\_\_\_  
52  
53  
54

55 **Question 12**

56 If taking a reduced dose of a medication would mean you could have less side effects from the  
57 drug, would you take the reduced dose?  
58

- 59  Yes  
60  
61  No  
62  
63  
64  
65

- 1  
2  
3  
4  
5  
6  
7  
8  
9  
10  
11  
12  
13  
14  
15  
16  
17  
18  
19  
20
- Other, please specify: \_\_\_\_\_

### Question 13

Many of these treatments involve coming to a hospital or clinic for intravenous for treatment. If you could receive the medication less often without affecting its ability to work, would you be willing to reduce the number of times you had to come to the cancer centre to receive it?

- Yes  
 No  
 I am comfortable receiving it every 3 to 4 week and would not want to change  
 Other, please specify: \_\_\_\_\_

### Question 14

Would you personally prefer taking oral medication daily, or an injection in the hospital or clinic every 1-3 months instead?

- I prefer taking oral medication daily  
 I prefer receiving an injection once every 1-3 months  
 Other, please specify: \_\_\_\_\_

### Question 15

Would you be willing to administer your own medication if it involved self-injection of a small needle?

- Yes  
 No

### Question 16

Finally, given that we really do not know the best frequency to give these drugs at, would you be willing to consider entering a closely monitored research study that would look at receiving your injection of bone-targeted medication every month or once every three months?

- Yes  
 No

### Thank you for your time! Any Comments?

Please use this area to provide any additional comments that you wish to share regarding this survey.

59  
60  
61  
62  
63  
64  
65
